# Supplementary material for: Fischer–Tropsch Synthesis: Effect of the Promoter’s Ionic Charge and Valence Level Energy on Activity
Source: MDPI journal article supplement (doi:10.3390/reactions2040026), 2021-10-10
Supplement: s1 [file s1]

**BET results**

The porosity of all iron catalysts was characterized by the nitrogen adsorption technique and it is followed in Table S1. The BET surface areas (12.5–14.2 m<sup>2</sup>/g), BJH pore volumes (0.11–0.12 cm<sup>3</sup>/g), and pore diameters (31–33 nm) were similar among the catalysts.

**Table S1.** BET surface area and pore size distribution.

| Catalyst description | S <sub>BET</sub> (m <sup>2</sup> /g) | Single point pore volume (cm <sup>3</sup> /g) | BJH pore volume (cm <sup>3</sup> /g) | Single point pore diameter (nm) | BJH pore diameter (nm) |
|----------------------|--------------------------------------|-----------------------------------------------|--------------------------------------|---------------------------------|------------------------|
| 100Fe                | 14.2±0.2                             | 0.117±0.003                                   | 0.119±0.006                          | 33±1.2                          | 31±0.5                 |
| 5K:100Fe             | 13.1±0.2                             | 0.107±0.003                                   | 0.108±0.005                          | 33±1.2                          | 31±0.5                 |
| 5Ba:100Fe            | 12.5±0.2                             | 0.101±0.003                                   | 0.111±0.006                          | 33±1.2                          | 33±0.5                 |
