# Supplementary material for: Fischer–Tropsch Synthesis: Effect of the Promoter’s Ionic Charge and Valence Level Energy on Activity
Source: MDPI journal article supplement (doi:10.3390/reactions2040026), 2021-10-10
Supplement: s1 [file s1]

Archive with 1 entries (1 files):
- reactions-1369376-supplementary.pdf
